# Supplementary material for: Molecular and Sociodemographic Colorectal Cancer Disparities in Latinos Living in Puerto Rico
Source: MDPI journal article supplement (doi:10.3390/genes14040894), 2023-04-11

**Table S1: Primer Information for CIMP Panel Genes**

| Primer Pair            | Forward                                | Reverse                            | AT  |
|------------------------|----------------------------------------|------------------------------------|-----|
| <i>CAGNA1G</i> UM      | TTG GAG TTT GGG TGT GAA GTG A          | CAC AAA TCC CAC TTC CCC TAC A      | 55° |
| <i>CAGNA1G</i> M       | GGA GTC GGT CGG TTG GTT C              | AAA ACA TAC TAC CCG CGA AAC G      | 60° |
| <i>IGF2</i> UM         | GGA TTG TGG GTG TTT AGT TTG GTT        | CCT TTC CAC ACT ACA TCC CAA AA     | 58° |
| <i>IGF2</i> M          | AGC GGT TTC GGT GTC GTT ATC            | CGA ACG CCC AAC TCG ATT            | 62° |
| <i>NEUROG1</i> UM      | TTG TTG GTT AAT TGG TGG TGT TGT        | CAT ACC TCA ACC ACT AAT CAC CCA    | 55° |
| <i>NEUROG1</i> M       | AAT TTA TGT TCG CGG GAG GTC            | ACC AAC TTA ACC CGA ACC GA         | 55° |
| <i>RUNX3</i> UM        | TTT GGG TTT ATG GGA ATA TG             | TTC TCA CAA CAA CAA CAA CC         | 55° |
| <i>RUNX3</i> M         | TGT TTT CGT TTA TTT TGT CG             | CGC TAT TAT ACG TAT TCC CG         | 55° |
| <i>SOCS1</i> UM        | GAT GGT TGG AGT TAG AAT TGG TTG TT     | CTC TAT ACT CCA CAA AAC TCT TCC CA | 60° |
| <i>SOCS1</i> M         | GTA TTT TTT TGG TGC GCG ATA GTC        | CGA CCG ACC TAA AAA TAC ACG C      | 66° |
| <i>CDKN2A (p16)</i> UM | TTA TTA GAG GGT GGG GTG GAT TGT        | CAA CCC CAA ACC ACA ACC ATA A      | 56° |
| <i>CDKN2A (p16)</i> M  | TAT TAG AGG GTG GGG CGG AT             | ACC CCG AAC CGC GAC CGT AA         | 58° |
| <i>CRAPB1</i> UM       | GAG GTT TTT TAG TTG GAG AGT GG         | AAC TCA CAA AAC AAA AAC TAA CAC T  | 62° |
| <i>CRAPB1</i> M        | GGA GGT TTT TTA GTT GGA GAG C          | CTC GCA AAA CGA AAA CTA ACG        | 63° |
| <i>MLH1</i> UM         | TTT TGA TGT AGA TGT TTT ATT AGG GTT GT | ACC ACC TCA TCA TAA CTA CCC ACA    | 60° |
| <i>MLH1</i> M          | TAT ATC GTT CGT AGT ATT CGT GT         | TCC GAC CCG AAT AAA CCC AA         | 60° |

**Figure S1: DNA integrity assessed by  $\beta$ -actin PCR analysis.** This representative figure shows the electrophoretic profile of 5 DNA samples assayed for the amplification of the 586 bp  $\beta$ -actin fragment.

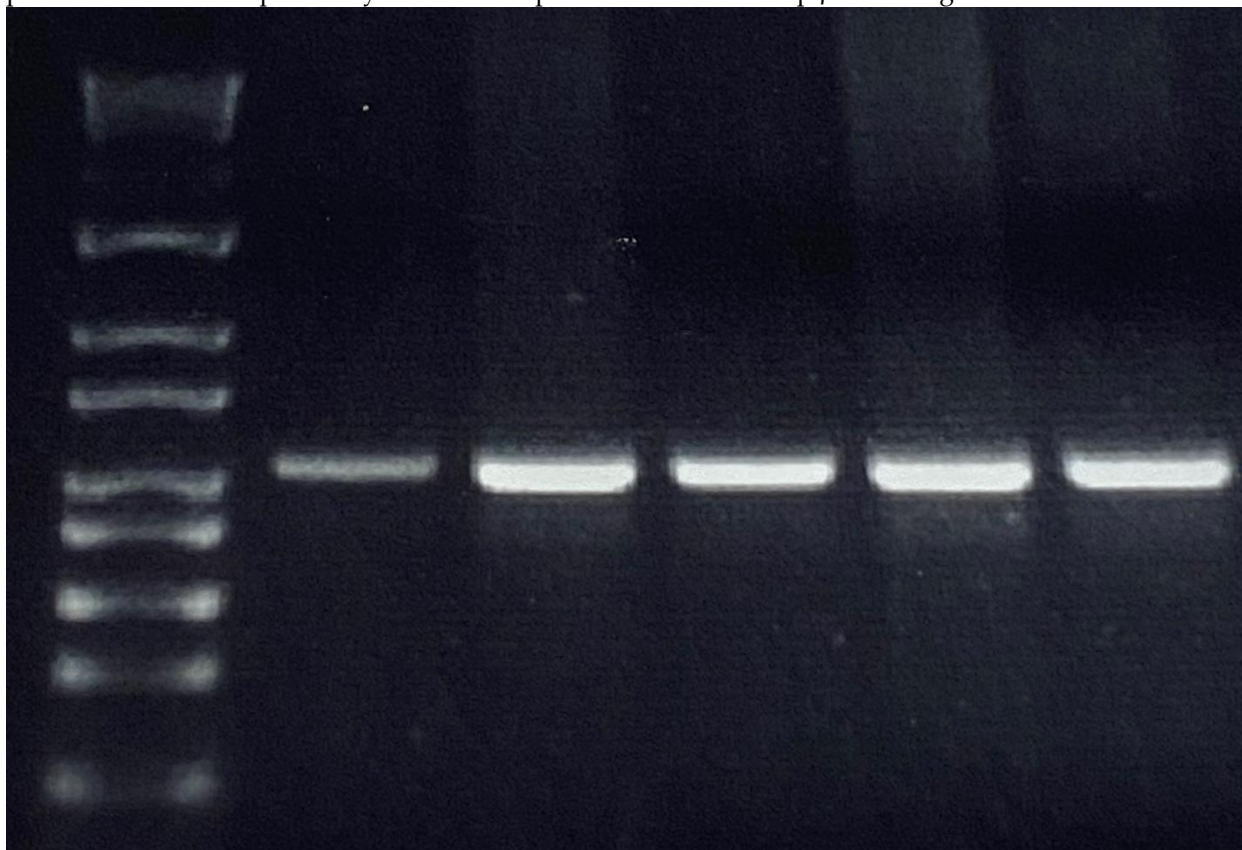

**Figure S2: TaqMan-based mutation panel analysis.** This representative amplification plot shows the mutation profile of a sample that was positive for the KRAS COSM553.

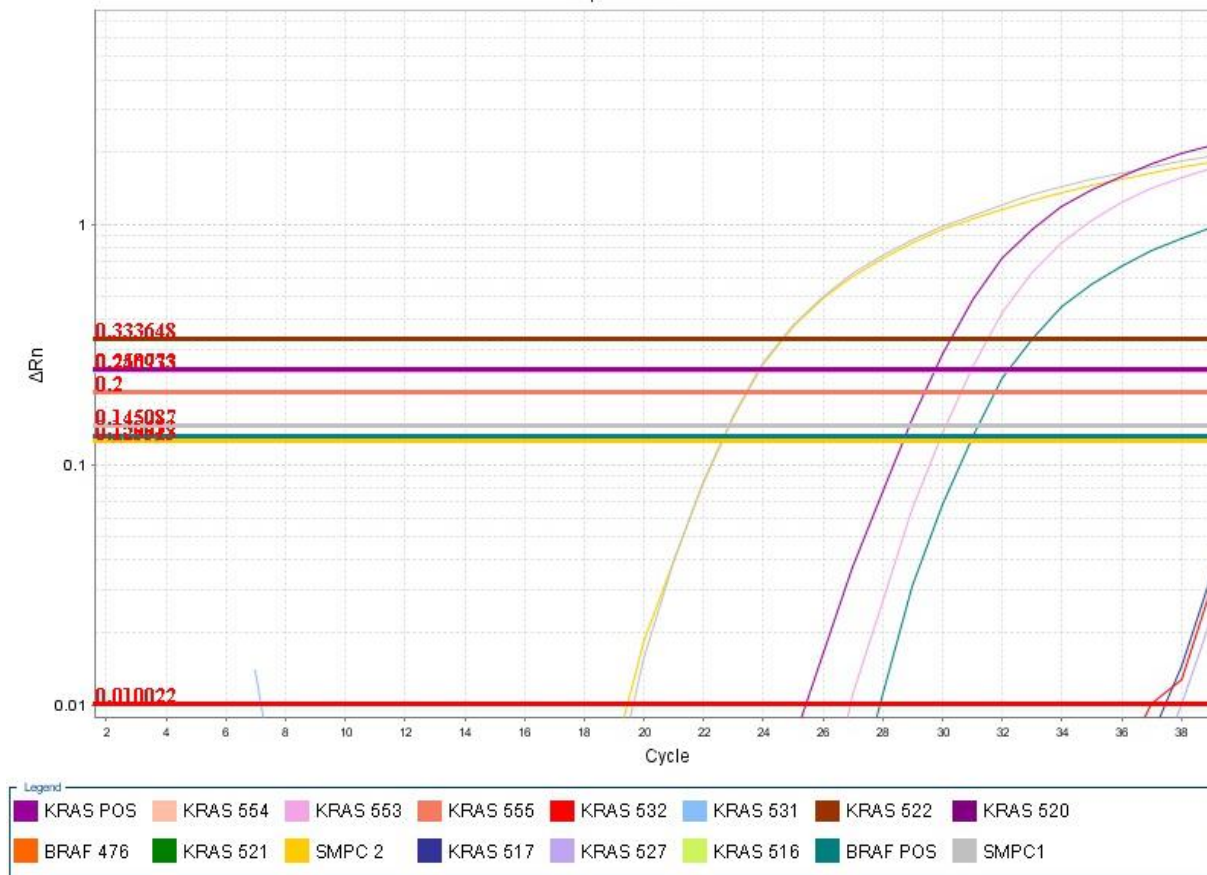

Supplement: s1 [file s1]
